# Supplementary material for: Harnessing the MYB-dependent TAL1 5’super-enhancer for targeted therapy in T-ALL
Source: PubMed Central journal article supplement (PMC9847025; doi:10.1186/s12943-022-01701-x), 2023-01-18
Supplement: 12943_2022_1701_MOESM1_ESM.pdf [file 12943_2022_1701_MOESM1_ESM.pdf]

## **Supplementary Information**

| Gene          | 5'SE (% of alteration) | SIL-TAL1 (% of alteration) | Other (% of alteration) | 5'SE vs. Other (Fisher Test) | 5'SE vs SIL-TAL1 (Fisher Test) |
|---------------|------------------------|----------------------------|-------------------------|------------------------------|--------------------------------|
| AKT1          | 0                      | 0                          | 1                       | 1,000                        | 1,000                          |
| ASXL1         | 6                      | 4                          | 5                       | 0,609                        | 0,567                          |
| BCL11B        | 17                     | 7                          | 19                      | 1,000                        | 0,348                          |
| CDKN2A        | 100                    | 86                         | 66                      | <b>0,001</b>                 | 0,186                          |
| CTCF          | 0                      | 2                          | 6                       | 0,612                        | 1,000                          |
| DNM2          | 0                      | 0                          | 19                      | 0,052                        | 1,000                          |
| <b>DNMT3A</b> | <b>0</b>               | <b>0</b>                   | <b>5</b>                | <b>1,000</b>                 | <b>1,000</b>                   |
| EED           | 0                      | 2                          | 5                       | 1,000                        | 1,000                          |
| EP300         | 0                      | 2                          | 5                       | 1,000                        | 1,000                          |
| ETV6          | 0                      | 0                          | 4                       | 1,000                        | 1,000                          |
| EZH2          | 0                      | 4                          | 9                       | 0,384                        | 1,000                          |
| FBXW7         | 11                     | 16                         | 21                      | 0,386                        | 1,000                          |
| FLT3          | 0                      | 0                          | 1                       | 1,000                        | 1,000                          |
| GATA3         | 0                      | 0                          | 1                       | 1,000                        | 1,000                          |
| IDH1          | 0                      | 0                          | 1                       | 1,000                        | 1,000                          |
| <b>IDH2</b>   | <b>6</b>               | <b>0</b>                   | <b>2</b>                | <b>0,337</b>                 | <b>0,240</b>                   |
| <b>IKZF1</b>  | <b>0</b>               | <b>4</b>                   | <b>7</b>                | <b>0,617</b>                 | <b>1,000</b>                   |
| IL7R          | 6                      | 0                          | 12                      | 0,706                        | 0,240                          |
| JAK1          | 0                      | 2                          | 8                       | 0,381                        | 1,000                          |
| JAK3          | 6                      | 4                          | 19                      | 0,216                        | 0,567                          |
| KMT2A         | 0                      | 5                          | 3                       | 1,000                        | 1,000                          |

| Gene        | 5'SE (% of alteration) | SIL-TAL1 (% of alteration) | Other (% of alteration) | 5'SE vs. Other (Fisher Test) | 5'SE vs. SIL-TAL1 (Fisher Test) |
|-------------|------------------------|----------------------------|-------------------------|------------------------------|---------------------------------|
| KMT2D       | 0                      | 2                          | 4                       | 1,000                        | 1,000                           |
| <b>KRAS</b> | <b>0</b>               | <b>0</b>                   | <b>5</b>                | <b>1,000</b>                 | <b>1,000</b>                    |
| LEF1        | 17                     | 19                         | 12                      | 0,459                        | 1,000                           |
| NF1         | 6                      | 2                          | 10                      | 1,000                        | 0,425                           |
| NOTCH1      | 39                     | 56                         | 76                      | <b>0,001</b>                 | 0,280                           |
| <b>NRAS</b> | <b>6</b>               | <b>0</b>                   | <b>10</b>               | <b>1,000</b>                 | <b>0,240</b>                    |
| PHF6        | 0                      | 7                          | 39                      | <b>&lt; 0,001</b>            | 0,567                           |
| PIK3CA      | 6                      | 0                          | 2                       | 0,337                        | 0,240                           |
| PIK3R1      | 6                      | 7                          | 3                       | 0,433                        | 1,000                           |
| <b>PTEN</b> | <b>17</b>              | <b>49</b>                  | <b>10</b>               | <b>0,418</b>                 | <b>0,026</b>                    |
| PTPN11      | 0                      | 2                          | 1                       | 1,000                        | 1,000                           |
| PTPN2       | 0                      | 2                          | 9                       | 0,382                        | 1,000                           |
| RUNX1       | 0                      | 0                          | 8                       | 0,380                        | 1,000                           |
| SETD2       | 0                      | 0                          | 5                       | 1,000                        | 1,000                           |
| SH2B3       | 0                      | 0                          | 5                       | 1,000                        | 1,000                           |
| STAT5B      | 11                     | 0                          | 8                       | 0,659                        | 0,055                           |
| SUZ12       | 6                      | 2                          | 16                      | 0,328                        | 0,425                           |
| TET2        | 11                     | 4                          | 2                       | 0,083                        | 0,242                           |
| TET3        | 0                      | 4                          | 2                       | 1,000                        | 1,000                           |
| <b>TP53</b> | <b>0</b>               | <b>2</b>                   | <b>5</b>                | <b>1,000</b>                 | <b>1,000</b>                    |
| WT1         | 0                      | 0                          | 12                      | 0,239                        | 1,000                           |

**Supplementary Table 1. Frequency of gene alterations according to TAL1 status**

Genes in red have been reported as associated with poor prognosis in T-ALL

| Total: n = 443                    | n = 60 (14%)    | SIL-TAL1 vs.<br>5'SE | n = 20 (5%)     | 5'SE vs. Other<br>T-ALL | n = 363         |
|-----------------------------------|-----------------|----------------------|-----------------|-------------------------|-----------------|
| Variable                          | SIL-TAL1        | p-value <sup>2</sup> | 5'SE            | p-value <sup>2</sup>    | Other T-ALLs    |
| Male                              | 47 / 60 (78%)   | >0.9                 | 16 / 20 (80%)   | 0.6                     | 265 / 363 (73%) |
| Age (y) <sup>1</sup>              | 12.8 (3.0-51.8) | 0.5                  | 12.0 (2.8-27.7) | <b>0.015</b>            | 16.5 (1.1-59.1) |
| WBC (G/l) <sup>1</sup>            | 165 (4-770)     | 0.15                 | 250 (26-980)    | <b>&lt;0.001</b>        | 47 (0-788)      |
| CNS Involvement                   | 7 / 59 (12%)    | 0.7                  | 3 / 20 (15%)    | 0.5                     | 40 / 361 (11%)  |
| <b>Immunophenotype</b>            |                 |                      |                 |                         |                 |
| ETP phenotype                     | 1 / 39 (3%)     | >0.9                 | 0 / 11 (0%)     | 0.13                    | 52 / 255 (20%)  |
| Immature (IM0/δ/γ)                | 0 / 53 (0%)     | 0.3                  | 1 / 18 (6%)     | 0.09                    | 83 / 325 (26%)  |
| Cortical (IMB, preαβ)             | 29 / 53 (55%)   | 0.4                  | 12 / 18 (67%)   | 0.15                    | 156 / 325 (48%) |
| Mature TCRαβ                      | 24 / 53 (45%)   | 0.3                  | 5 / 18 (28%)    | 0.07                    | 39 / 325 (12%)  |
| αβ lineage                        | 53 / 53 (100%)  | 0.2                  | 17 / 18 (94%)   | <b>0.002</b>            | 195 / 325 (60%) |
| Mature TCRγδ                      | 0 / 53 (0%)     | >0.9                 | 0 / 18 (0%)     | 0.15                    | 47 / 325 (14%)  |
| <b>Oncogenetic classification</b> |                 |                      |                 |                         |                 |
| TLX1                              | 0 / 60 (0%)     | >0.9                 | 0 / 20 (0%)     | 0.09                    | 49 / 321 (15%)  |
| TLX3                              | 0 / 60 (0%)     | >0.9                 | 0 / 20 (0%)     | <b>0.02</b>             | 68 / 321 (21%)  |
| CALM-AF10                         | 0 / 60 (0%)     | >0.9                 | 0 / 20 (0%)     | >0.9                    | 11 / 321 (3%)   |
| High Risk Classifier              | 39 / 58 (67%)   | 0.6                  | 12 / 20 (60%)   | 0.10                    | 145 / 360 (40%) |
| <b>Treatment Response</b>         |                 |                      |                 |                         |                 |
| Prednisone response               | 18 / 56 (32%)   | 0.6                  | 8 / 19 (42%)    | 0.2                     | 203 / 359 (57%) |
| Chemosensitivity                  | 54 / 59 (92%)   | 0.11                 | 15 / 20 (75%)   | 0.6                     | 238 / 355 (67%) |
| MRD1 > 10 <sup>-4</sup>           | 21 / 49 (43%)   | 0.4                  | 5 / 17 (29%)    | 0.5                     | 103 / 256 (40%) |
| Complete Remission                | 57 / 60 (95%)   | 0.6                  | 18 / 20 (90%)   | 0.7                     | 335 / 363 (92%) |
| Allograft                         | 7 / 59 (12%)    | 0.7                  | 1 / 19 (5%)     | <b>0.03</b>             | 97 / 347 (28%)  |
| <b>Outcome</b>                    |                 |                      |                 |                         |                 |
| 5-year CIR [95% CI]               | 36% [25;50]     | <b>0.04</b>          | 50% [30;74]     | <b>0.003</b>            | 28% [23;33]     |
| 5-year OS [95% CI]                | 63% [49;74]     | <b>0.02</b>          | 45% [23;65]     | <b>0.001</b>            | 72% [67;76]     |

**Supplementary Table 2. Clinical features of 5'SE mutated T-ALL vs. SIL-TAL1 vs.**

**Other T-ALL**

<sup>1</sup> Statistics presented: Median (Minimum-Maximum)

<sup>2</sup> Statistical tests performed: Fisher's exact test; Wilcoxon rank-sum test. *p*-values <0.05 are indicated in bold WBC, White blood count; CNS, central nervous system; ETP, early thymic precursor; High Risk classifier, NOTCH1/FBXW7-RAS/ PTEN classifier <sup>1</sup>; CR, complete remission; MRD, minimal residual disease; Allo-HSCT, allogeneic hematopoietic stem cell transplantation; CIR, cumulative incidence of relapse; OS, overall survival, CI: confidence interval.

**A**

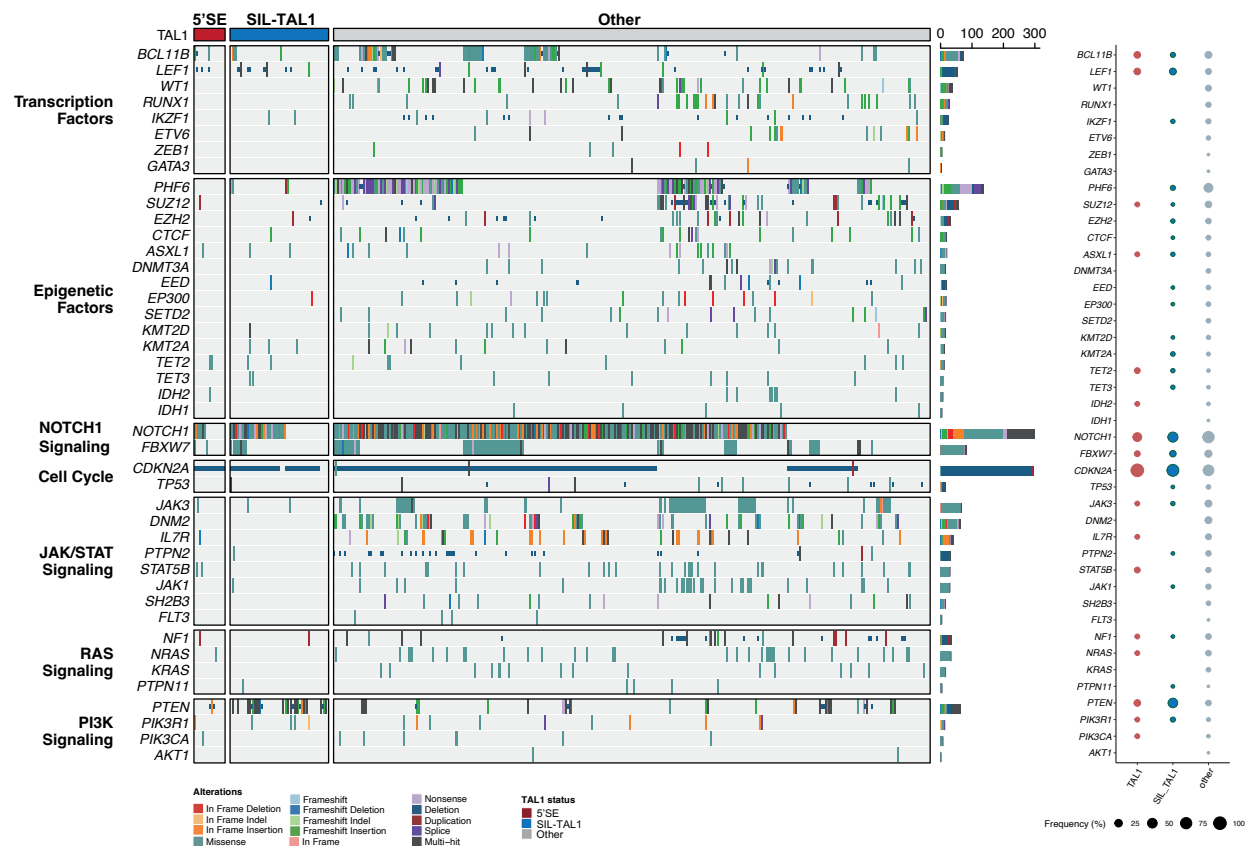

**B**

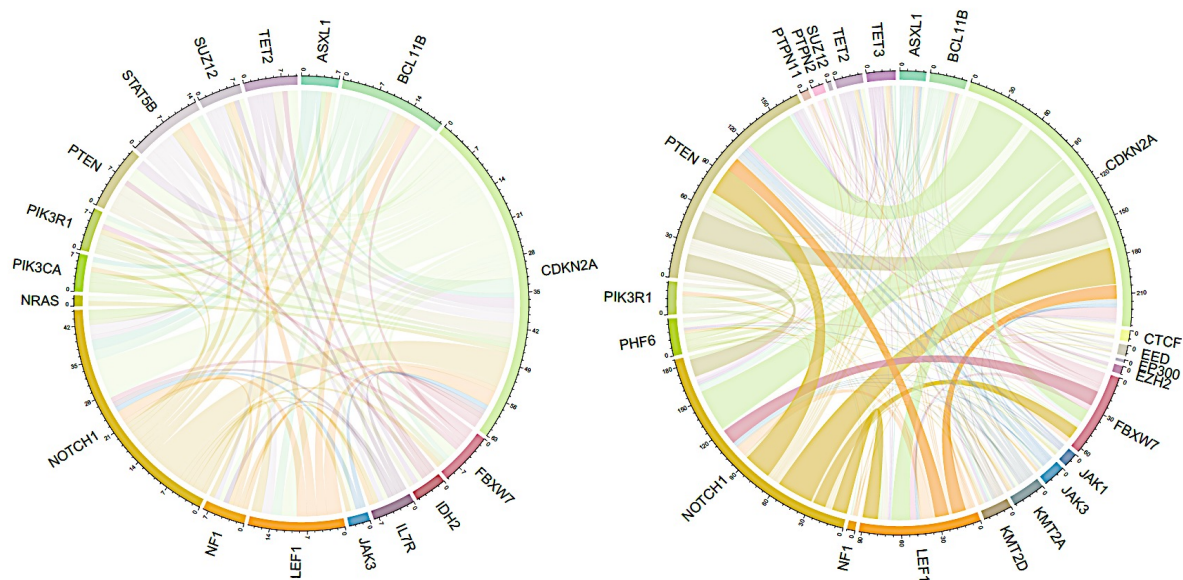

**Fig. S1.**

A) Oncoplot showing the mutation profiles of 5'SE, SIL-TAL1 and other T-ALL and their relative mutation frequencies.

B) Circos plot demonstrating the mutational co-occurrences in 5'SE T-ALL (left) and SIL-TAL1 T-ALL (right).

**A**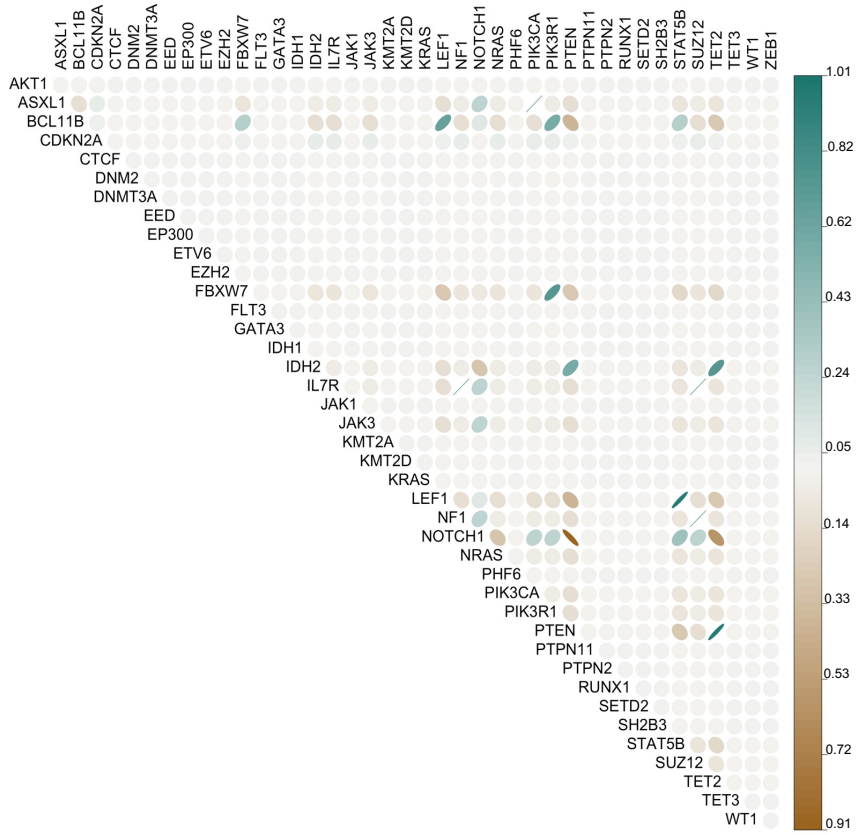**B**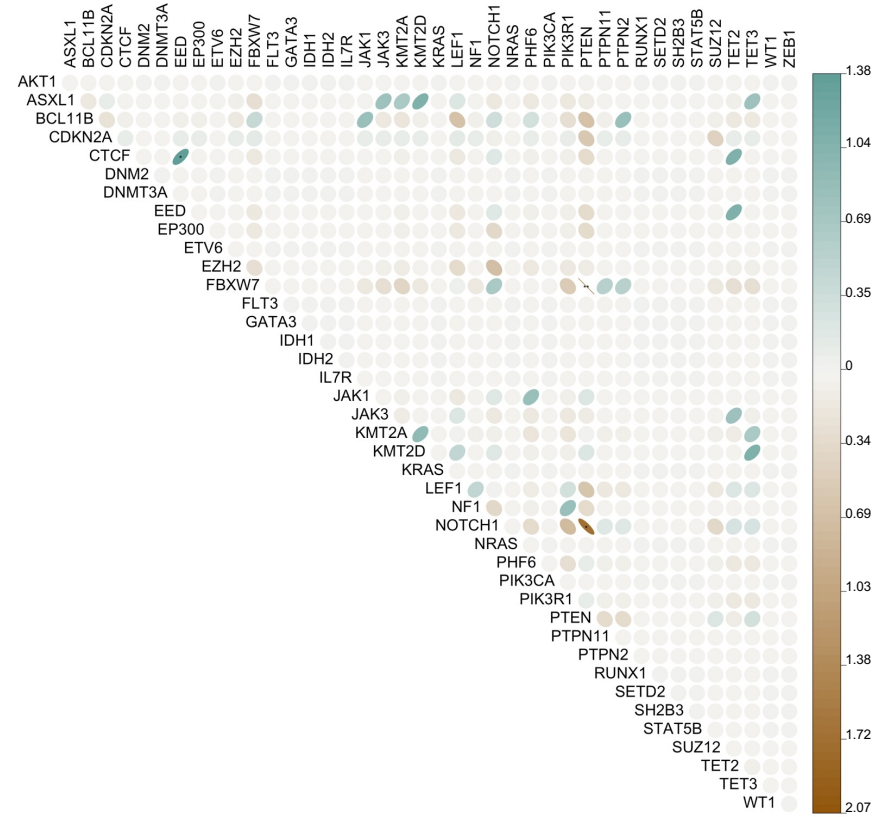



**Fig. S2**

A) Corroplot showing co-mutations in 5'SE patients and (B) SIL-TAL1 patients. Co-occurrences and mutual exclusions in 5'SE and SIL-TAL1 T-ALL were computed with the DISCOVER algorithm. Strong correlations are indicated by large ellipses whereas weak correlations are indicated by small ellipses. The colors of the scale bar denote the nature of the correlation, with +1 indicating a perfect positive correlation (blue) and -1 indicating a perfect negative correlation (brown) between two genetic alterations.

**A**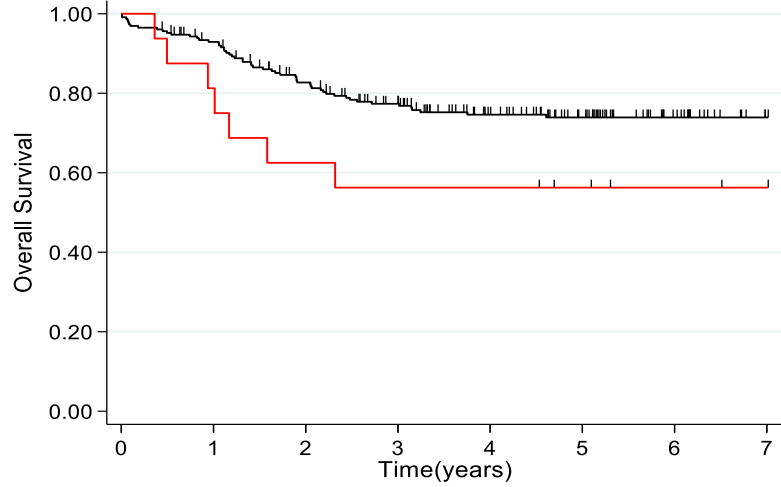

| Number at risk |      | 0   | 1   | 2   | 3   | 4   | 5  | 6  | 7  |
|----------------|------|-----|-----|-----|-----|-----|----|----|----|
| Not 5'SE       | 5'SE | 228 | 204 | 173 | 149 | 119 | 96 | 66 | 48 |
|                |      | 16  | 13  | 10  | 9   | 9   | 7  | 5  | 4  |

**B**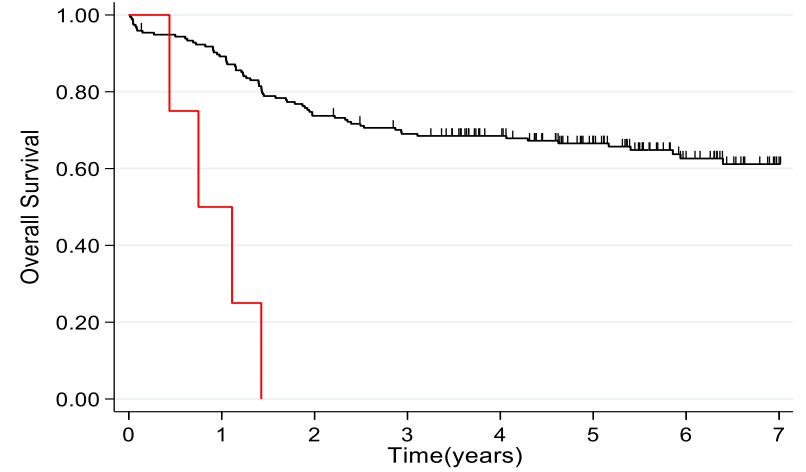

| Number at risk |      | 0   | 1   | 2   | 3   | 4   | 5  | 6  | 7  |
|----------------|------|-----|-----|-----|-----|-----|----|----|----|
| Not 5'SE       | 5'SE | 195 | 173 | 143 | 131 | 113 | 85 | 52 | 29 |
|                |      | 4   | 2   | 0   | 0   | 0   | 0  | 0  | 0  |

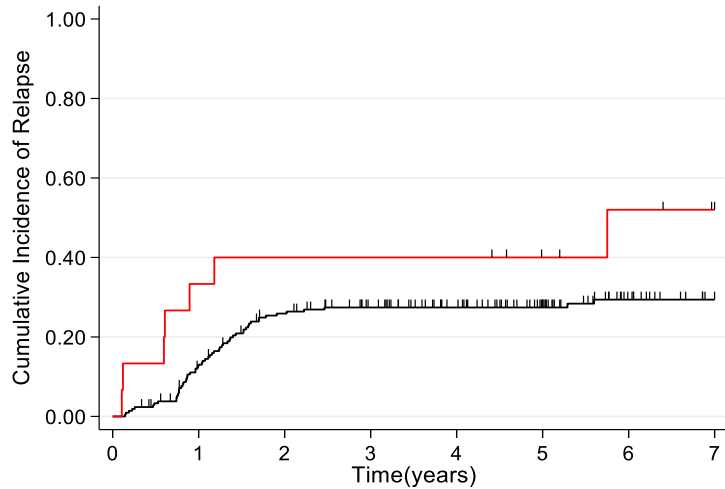

| Number at risk |      | 0   | 1   | 2   | 3   | 4   | 5  | 6  | 7  |
|----------------|------|-----|-----|-----|-----|-----|----|----|----|
| Not 5'SE       | 5'SE | 212 | 178 | 147 | 131 | 112 | 88 | 61 | 47 |
|                |      | 15  | 10  | 9   | 9   | 9   | 6  | 4  | 2  |

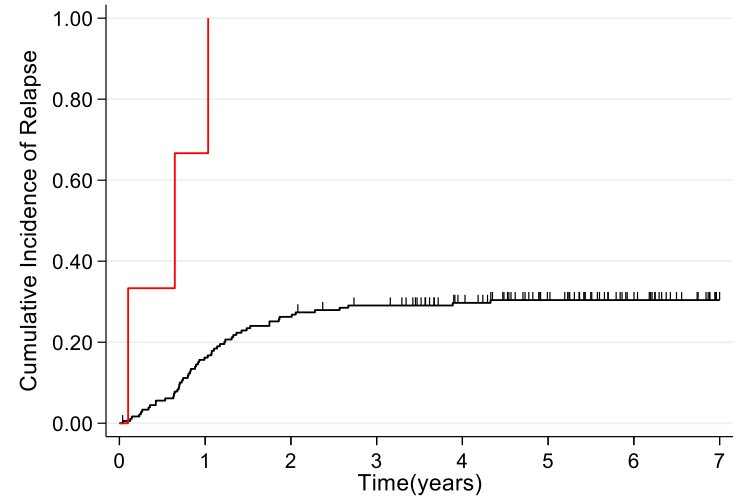

| Number at risk |      | 0   | 1   | 2   | 3   | 4   | 5  | 6  | 7  |
|----------------|------|-----|-----|-----|-----|-----|----|----|----|
| Not 5'SE       | 5'SE | 180 | 150 | 132 | 124 | 106 | 84 | 61 | 39 |
|                |      | 3   | 1   | 0   | 0   | 0   | 0  | 0  | 0  |

**Fig. S3.**

A) Kaplan Meier survival curve (top panel) and cumulative incidence of relapse (bottom panel) for pediatric FRALLE 2000 T-ALL

B) Kaplan Meier survival curve (top panel) and cumulative incidence of relapse (bottom panel) for adult GRAALL 2003-2005 T-ALL

**A**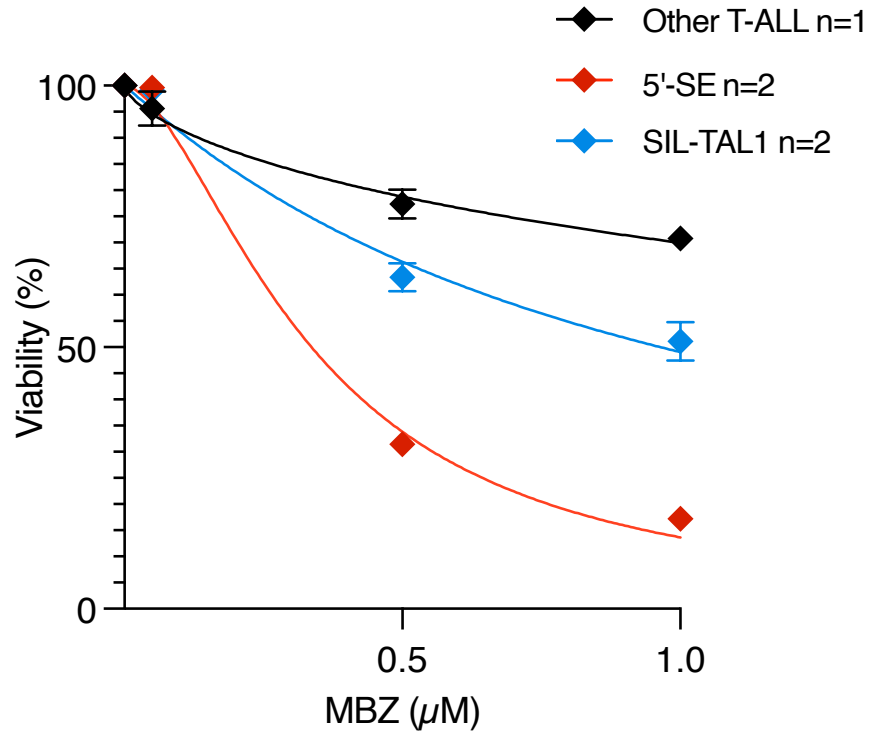**B**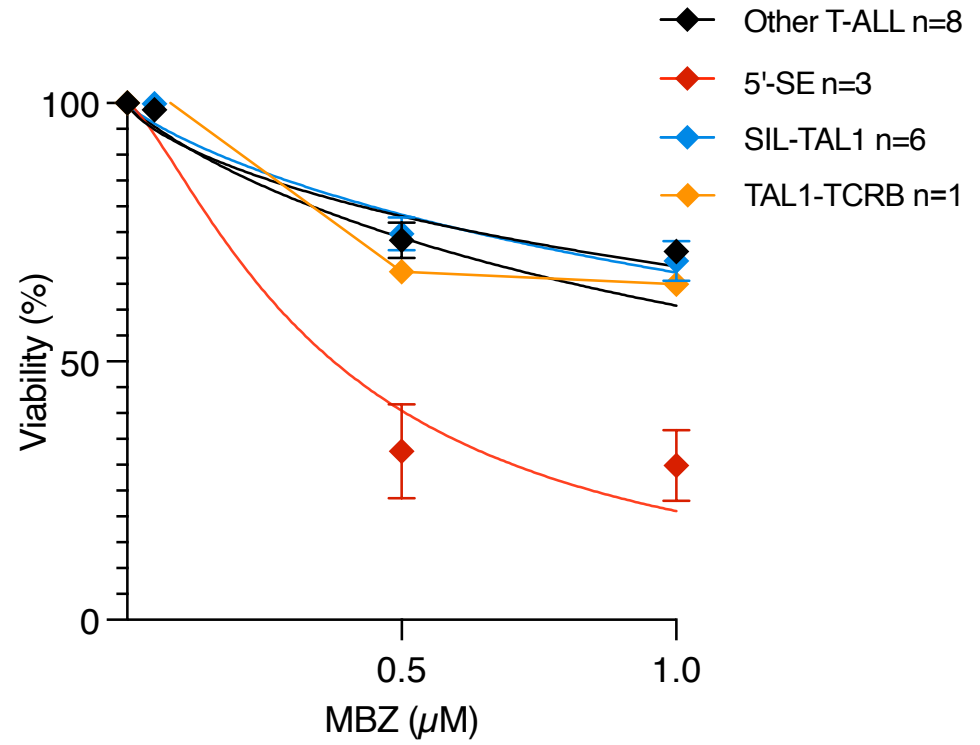

**Fig S4.**

Viability curves of 5'SE, SIL-TAL1, and Other T-ALL Cell lines (A) and PDX (B) at increasing Mebendazole concentrations. Viability was normalized to DMSO controls. The Mean and SEM are shown of duplicate samples. (Two-way ANOVA; 5'SE vs. SIL-TAL1 and Other T-ALL  $p < 0.0001$ . IC50s 5'SE cell lines =  $0.34\mu\text{M}$ , SIL-TAL1 cell lines –  $0.97\mu\text{M}$ , Other T-ALL cell line =  $3.52\mu\text{M}$ . IC50s for 5'SE PDXs =  $0.38\mu\text{M}$ , SIL-TAL1 PDXs =  $2.39\mu\text{M}$ , TAL1-TCRB PDX =  $1.66\mu\text{M}$ , Other T-ALL PDXs =  $2.94\mu\text{M}$ .

## Supplementary References

- 1 Trinquand A, Tanguy-Schmidt A, Ben Abdelali R, Lambert J, Beldjord K, Lengliné E *et al.* Toward a NOTCH1/FBXW7/RAS/PTEN–Based Oncogenetic Risk Classification of Adult T-Cell Acute Lymphoblastic Leukemia: A Group for Research in Adult Acute Lymphoblastic Leukemia Study. *J Clin Oncol* 2013; **31**: 4333–4342.
